# Supplementary material for: Multi-Targeting Neuroprotective Effects of Syzygium aromaticum Bud Extracts and Their Key Phytocompounds against Neurodegenerative Diseases
Source: MDPI journal article supplement (doi:10.3390/ijms24098148), 2023-05-02
Supplement: s1 [file s1]

## Supplementary information

Supplementary Figure S1. Phytoconstituents identified in (A) CL-EA and (B) CL-H extract from *Syzygium aromaticum* buds using gas chromatography-mass spectrometry.

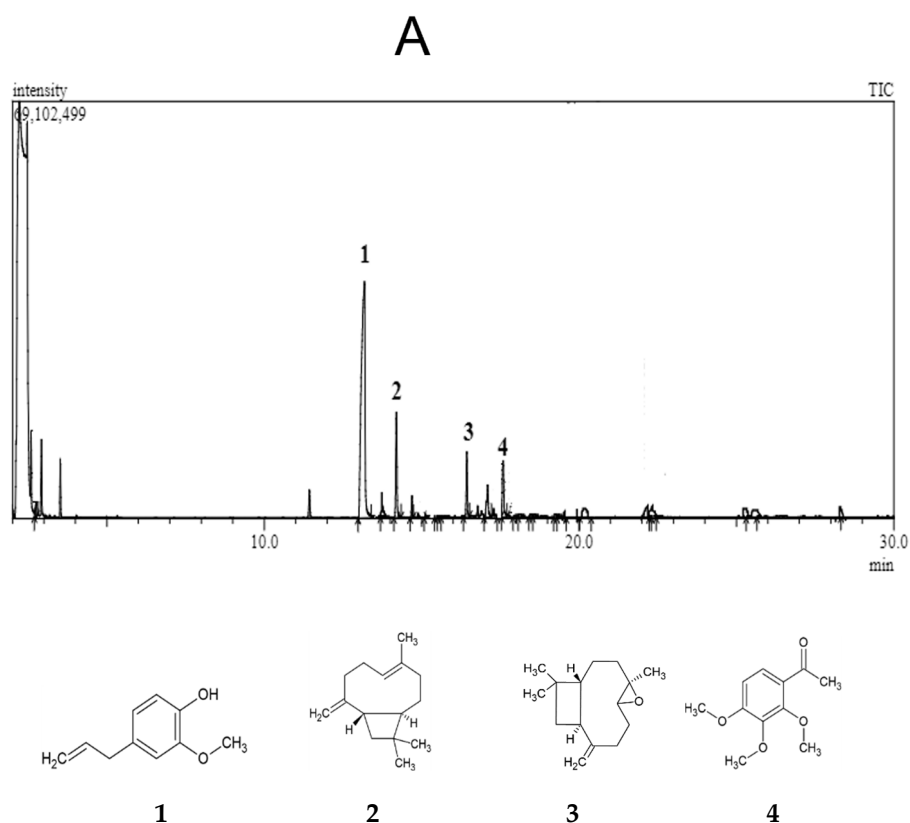

| Peak Report TIC |        |           |          |          |            |                                                |
|-----------------|--------|-----------|----------|----------|------------|------------------------------------------------|
| Major Peak no.  | R.Time | Area      | Area (%) | Height   | Height (%) | Name                                           |
|                 | 2.743  | 6112358   | 1.16     | 2316736  | 2.01       | Oxalic acid, monoamide, n-propyl, pentyl ester |
| 1               | 13.185 | 311542886 | 59.32    | 39130217 | 33.98      | Eugenol                                        |
|                 | 13.725 | 1988913   | 0.38     | 870766   | 0.76       | Vanillin                                       |
| 2               | 14.2   | 50249612  | 9.57     | 18563146 | 16.12      | Caryophyllene                                  |
|                 | 14.694 | 8004729   | 1.52     | 3601283  | 3.13       | Humulene                                       |
|                 | 15.128 | 1160086   | 0.22     | 458020   | 0.4        | .alpha.-Farnesene                              |

|          |               |                 |             |                 |             |                                                                                        |
|----------|---------------|-----------------|-------------|-----------------|-------------|----------------------------------------------------------------------------------------|
|          | 15.451        | 6657888         | 1.27        | 2252939         | 1.96        | .alfa.-Copaene                                                                         |
|          | 15.529        | 3040768         | 0.58        | 1183519         | 1.03        | cis-Calamenene                                                                         |
|          | 15.676        | 3114138         | 0.59        | 1403529         | 1.22        | Cubenene                                                                               |
| <b>3</b> | <b>16.435</b> | <b>27721704</b> | <b>5.28</b> | <b>10998928</b> | <b>9.55</b> | <b>Caryophyllene oxide</b>                                                             |
|          | 17.097        | 20730339        | 3.95        | 5756851         | 5           | Caryophylla-4(12),8(13)-dien-5.alpha.-ol                                               |
|          | 17.46         | 10436910        | 1.99        | 3855739         | 3.35        | (-)-Globulol                                                                           |
| <b>4</b> | <b>17.589</b> | <b>31889618</b> | <b>6.07</b> | <b>10276552</b> | <b>8.92</b> | <b>2',3',4' Trimethoxyacetophenone</b>                                                 |
|          | 17.961        | 1581228         | 0.3         | 308970          | 0.27        | Ethyl homovanillate                                                                    |
|          | 18.125        | 3835516         | 0.73        | 1368803         | 1.19        | (E)-4-(3-Hydroxyprop-1-en-1-yl)-2-methoxyphenol                                        |
|          | 18.468        | 3168387         | 0.6         | 1126725         | 0.98        | Deoxyqinghaosu                                                                         |
|          | 18.587        | 2415122         | 0.46        | 828828          | 0.72        | Ledene oxide-(II)                                                                      |
|          | 19.253        | 4308143         | 0.82        | 1754673         | 1.52        | 2,6,10,15,19,23-Hexamethyl-tetracos-2,10,14,18,22-pentaene-6,7-diol                    |
|          | 19.338        | 1037695         | 0.2         | 366649          | 0.32        | Epiglobulol                                                                            |
|          | 19.635        | 1446073         | 0.28        | 618103          | 0.54        | 1-(4-Acetoxy-3-methoxyphenyl)allyl acetate                                             |
|          | 20.068        | 1252840         | 0.24        | 532972          | 0.46        | (3S,3aS,6R,7R,9aS)-1,1,7-Trimethyldecahydro-3a,7-methanocyclopenta[8]annulene-3,6-diol |
|          | 20.492        | 7138554         | 1.36        | 2309704         | 2.01        | Pentadecanoic acid                                                                     |
|          | 22.272        | 3088742         | 0.59        | 1276908         | 1.11        | Linoelaidic acid                                                                       |
|          | 22.33         | 5507793         | 1.05        | 1492674         | 1.3         | cis-9-Hexadecenal                                                                      |
|          | 22.529        | 2298071         | 0.44        | 635463          | 0.55        | Z,Z-8,10-Hexadecadien-1-ol                                                             |
|          | 25.371        | 1787959         | 0.34        | 690363          | 0.6         | Benzonitrile, m-phenethyl-                                                             |
|          | 25.687        | 1119045         | 0.21        | 407691          | 0.35        | Anethole                                                                               |
|          | 28.397        | 2511706         | 0.48        | 759977          | 0.66        | 3-Allyl-6-methoxyphenol                                                                |
|          |               | 525146823       | 100         | 115146728       | 100         |                                                                                        |

# B

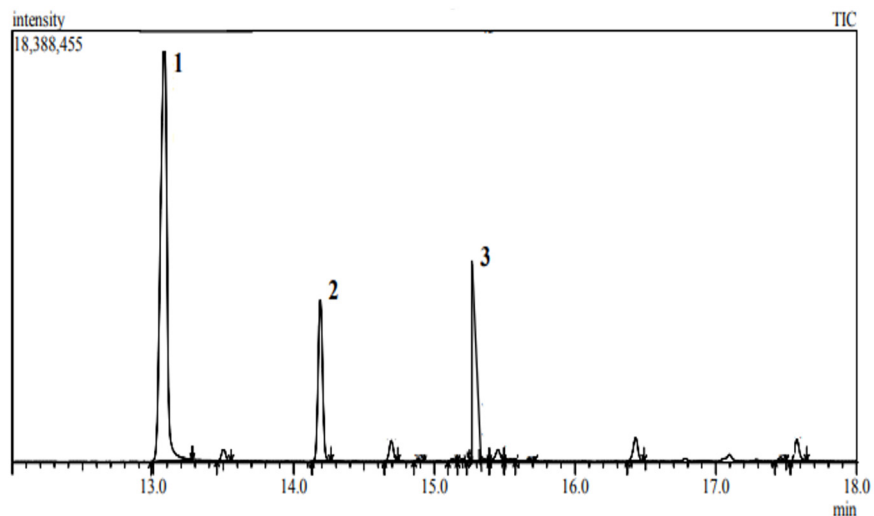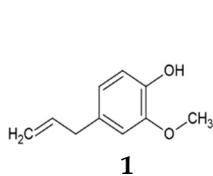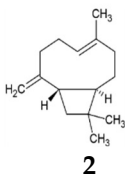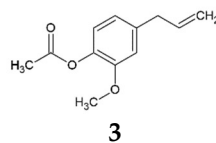

| Peak Report TIC |               |                 |              |                 |              |                                                                                                       |
|-----------------|---------------|-----------------|--------------|-----------------|--------------|-------------------------------------------------------------------------------------------------------|
| Major Peak no.  | R.Time        | Area            | Area (%)     | Height          | Height (%)   | Name                                                                                                  |
| <b>1</b>        | <b>13.082</b> | <b>57686726</b> | <b>57.46</b> | <b>18322133</b> | <b>48.93</b> | <b>Eugenol</b>                                                                                        |
|                 | 13.502        | 1050351         | 1.05         | 520186          | 1.39         | .alfa.-Copaene                                                                                        |
| <b>2</b>        | <b>14.189</b> | <b>15301912</b> | <b>15.24</b> | <b>6996474</b>  | <b>18.69</b> | <b>Caryophyllene</b>                                                                                  |
|                 | 14.693        | 1805864         | 1.8          | 874229          | 2.33         | Humulene                                                                                              |
|                 | 14.887        | 176576          | 0.18         | 95409           | 0.25         | Copaene                                                                                               |
|                 | 15.13         | 239854          | 0.24         | 107870          | 0.29         | .alpha.-Farnesene                                                                                     |
|                 | 15.197        | 238987          | 0.24         | 104299          | 0.28         | (3R,3aR,3bR,4S,7R,7aR)-4-Isopropyl-3,7-dimethyloctahydro-1H-cyclopenta[1,3]cyclopropa[1,2]benzen-3-ol |
| <b>3</b>        | <b>15.288</b> | <b>17269865</b> | <b>17.2</b>  | <b>7536787</b>  | <b>20.13</b> | <b>Eugenyl acetate</b>                                                                                |
|                 | 15.452        | 1265188         | 1.26         | 492394          | 1.32         | 1-Isopropyl-4,7-dimethyl-1,2,3,5,6,8a-hexahydronaphthalene                                            |
|                 | 15.528        | 377278          | 0.38         | 164696          | 0.44         | cis-Calamenene                                                                                        |
|                 | 15.676        | 234185          | 0.23         | 128659          | 0.34         | Cubenene                                                                                              |
|                 | 16.43         | 2358271         | 2.35         | 1021698         | 2.73         | Caryophyllene oxide                                                                                   |
|                 | 17.459        | 333055          | 0.33         | 155747          | 0.42         | (-)-Globulol                                                                                          |
|                 | 17.575        | 2049815         | 2.04         | 922087          | 2.46         | 2',3',4' Trimethoxyacetophenone                                                                       |
|                 |               | 100387927       | 100          | 37442668        | 100          |                                                                                                       |
